## Correction: Targeting a ribonucleoprotein complex containing the caprin-1 protein and the c-Myc mRNA suppresses tumor growth in mice: an identification of a novel oncotarget

Ya-Qi Qiu<sup>1,2</sup>, Cheng-Wei Yang<sup>1</sup>, Yue-Zhi Lee<sup>1</sup>, Ruey-Bing Yang<sup>3</sup>, Chih-Hao Lee<sup>4</sup>, Hsing-Yu Hsu<sup>1</sup>, Chien-Chung Chang<sup>2</sup> and Shio-Ju Lee<sup>1</sup>

<sup>1</sup>Institute of Biotechnology and Pharmaceutical Research, National Health Research Institutes, Miaoli, Taiwan

<sup>2</sup>Graduate Program of Biotechnology in Medicine, Institute of Molecular & Cellular Biology, National Tsing Hua University, Hsinchu, Taiwan

<sup>3</sup>Institute of Biomedical Sciences, Academia Sinica, Taipei, Taiwan

<sup>4</sup>Department of Genetics and Complex Diseases, Division of Biological Sciences, Harvard School of Public Health, Boston, Massachusetts, USA

Published: August 06, 2019

Copyright: Qiu et al. This is an open-access article distributed under the terms of the Creative Commons Attribution License 3.0 (CC BY 3.0), which permits unrestricted use, distribution, and reproduction in any medium, provided the original author and source are credited.

**This article has been corrected:** During manuscript editing according to the reviewers' comments, the tubulin control for cyclin D1 in Figure 4A right panel was accidentally misplaced. The corrected Figure 4A is shown below. The authors declare that these corrections do not change the results or conclusions of this paper.

Original article: Oncotarget. 2015; 6:2148–2163. <https://doi.org/10.18632/oncotarget.3236>

Corrected Figure 4A

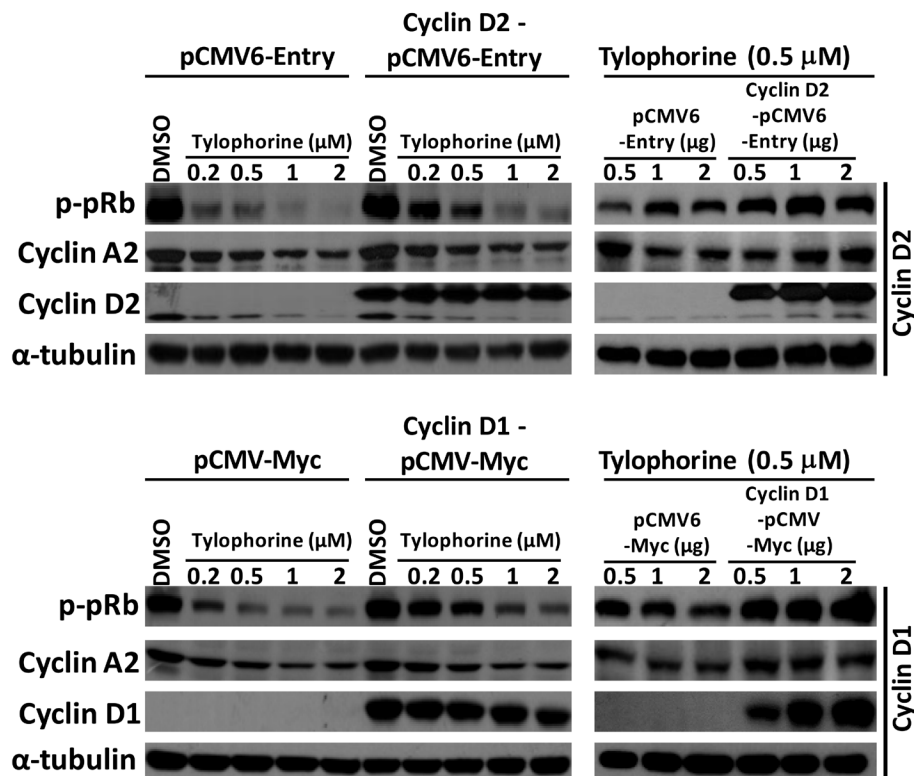

Source: https://www.oncotarget.com/article/27074/pdf/
